# Supplementary material for: From hair to liver: emerging application of hair follicle mesenchymal stem cell transplantation reverses liver cirrhosis by blocking the TGF-β/Smad signaling pathway to inhibit pathological HSC activation
Source: PeerJ journal article supplement (doi:10.7717/peerj.12872), 2022-02-15
Supplement: Fig._2C-E.zip [file Fig._2C-E.zip]

## Sheet: Sheet1
groups	ALT	AST	ALP
Normal	55.76	99.86	128.9
	44.19	82.71	113.74
	63.83	105.49	138.25
LC	140.42	203.19	153.46
	158.29	219.8	154.2
	142.93	227.35	172.59
