# Supplementary material for: From hair to liver: emerging application of hair follicle mesenchymal stem cell transplantation reverses liver cirrhosis by blocking the TGF-β/Smad signaling pathway to inhibit pathological HSC activation
Source: PeerJ journal article supplement (doi:10.7717/peerj.12872), 2022-02-15
Supplement: Fig._3C-E.zip [file Fig._3C-E.zip]

## Sheet: Sheet1
groups	ALT	AST	ALB
Normal	29.67	86.29	27.94
	32.01	107.38	26.6
	26.69	82.97	28.57
LC	169.85	235.89	18.28
	183.72	259.01	18.97
	172.9	220.36	17.42
LC+HF-MSCs	124.89	135.59	21.96
	145.36	157.21	23.87
	132.71	143.67	20.05
