# Supplementary material for: From hair to liver: emerging application of hair follicle mesenchymal stem cell transplantation reverses liver cirrhosis by blocking the TGF-β/Smad signaling pathway to inhibit pathological HSC activation
Source: PeerJ journal article supplement (doi:10.7717/peerj.12872), 2022-02-15
Supplement: Fig._4I-J.zip [file Fig._4I-J.zip]

## Sheet: Sheet1
ALB	Pearson's	Overlap coefficient
	0.85	0.81
	0.79	0.78
	0.83	0.75
CK18	Pearson's	Overlap coefficient
	0.82	0.88
	0.71	0.8
	0.77	0.83
