# Supplementary material for: From hair to liver: emerging application of hair follicle mesenchymal stem cell transplantation reverses liver cirrhosis by blocking the TGF-β/Smad signaling pathway to inhibit pathological HSC activation
Source: PeerJ journal article supplement (doi:10.7717/peerj.12872), 2022-02-15
Supplement: Fig._5D-F.zip [file Fig._5D-F.zip]

## Sheet: Results
groups	α-SMA/β-actin protein levels	TGF-β/β-actin protein levels	p-smad2/3/β-actin protein levels
JS1	1	1	1
	1	1	1
	1	1	1
JS1+HF-MSCs	0.672209	0.679182	0.592926
	0.59263	0.678899	0.581039
	0.553795	0.728107	0.54854
