# Supplementary material for: From hair to liver: emerging application of hair follicle mesenchymal stem cell transplantation reverses liver cirrhosis by blocking the TGF-β/Smad signaling pathway to inhibit pathological HSC activation
Source: PeerJ journal article supplement (doi:10.7717/peerj.12872), 2022-02-15
Supplement: Fig._6B-D.zip [file Fig._6B-D.zip]

## Sheet: 内参
							groups	α-SMA/β-actin protein levels	TGF-β/β-actin protein levels	p-smad2/3/β-actin protein levels
							Normal	1	1	1
								1	1	1
								1	1	1
							LC	2.24641	5.76584	4.18731
								2.63632	3.46922	7.79881
								2.78356	4.02789	5.06492
							LC+HF-MSCs	1.68487	3.08507	1.75668
								1.62397	2.10466	3.11763
								1.89315	2.32981	2.17827
